# Supplementary material
Source: PubMed Central journal article supplement (PMC10499536)
Supplement: NIHMS1930256-supplement-Supplementary_Figures_and_Table.pdf [file NIHMS1930256-supplement-Supplementary_Figures_and_Table.pdf]

**Supplementary information**

---

**Structural principles of B cell antigen  
receptor assembly**

---

In the format provided by the  
authors and unedited

**Supplementary Fig 1. Uncropped SDS-PAGE gels and immunoblots.**

**Supplementary Fig 2. Uncropped SDS-PAGE gels and immunoblots.**

**Supplementary Table 1. Summary of mutagenesis data.**

**Supplementary Fig 1. Uncropped SDS-PAGE gels and immunoblots.** Relative positions of the scans within a panel (black box) follow those in the Extended Data Fig. 1b-c. Blue boxes indicate cropped areas. Molecular weight markers are shown in kDa.

**Extended Data Fig. 1b**

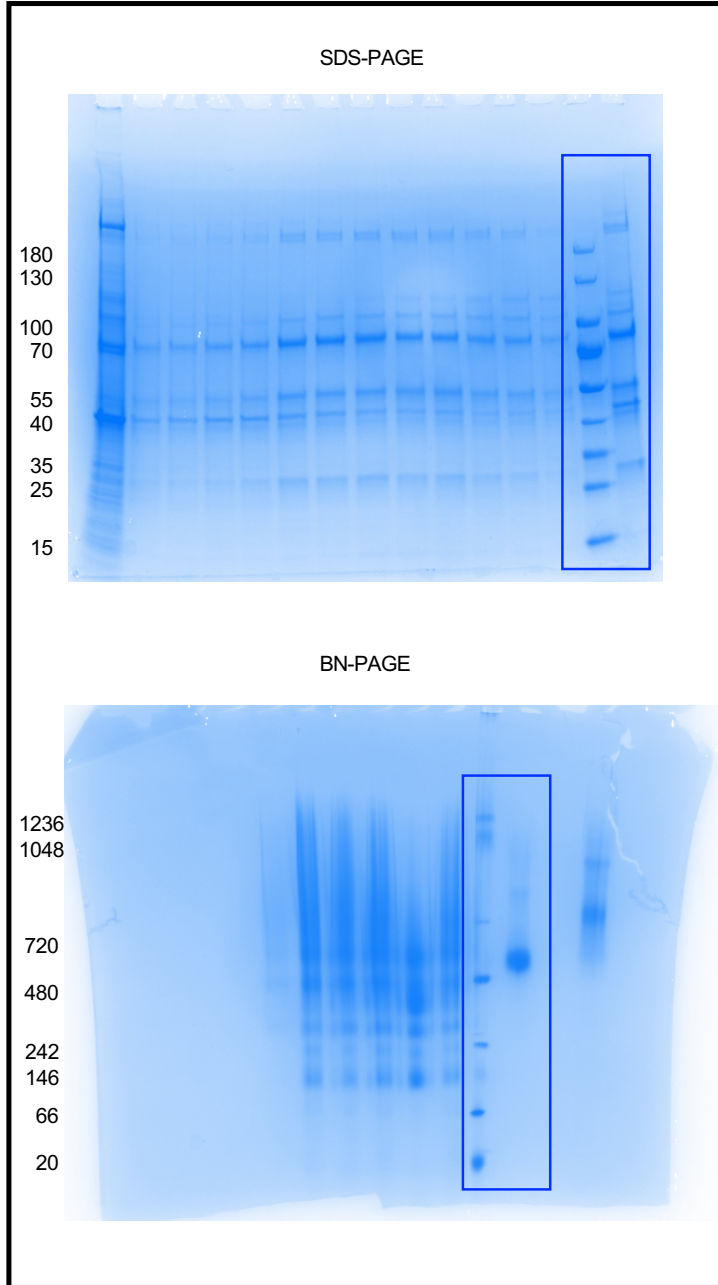

**Extended Data Fig. 1c**

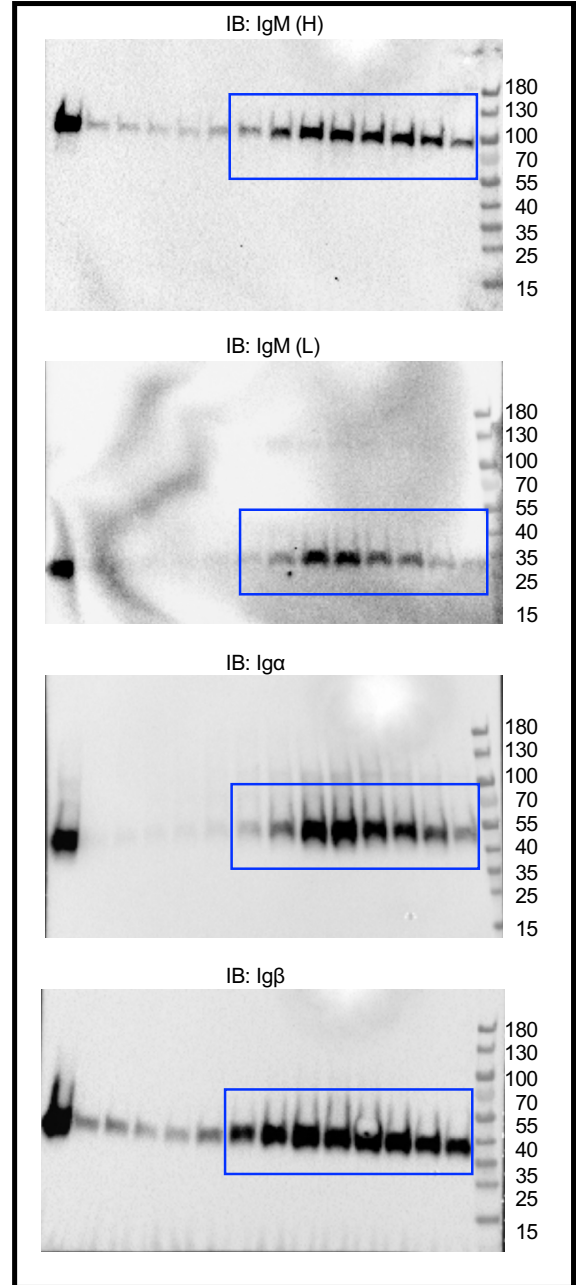

**Supplementary Fig 2. Uncropped SDS-PAGE gels and immunoblots.** Relative positions of the scans within a panel (black box) follow those in the Extended Data Fig. 2b-c. Blue boxes indicate cropped areas. Molecular weight markers are shown in kDa.

**Extended Data Fig. 2b**

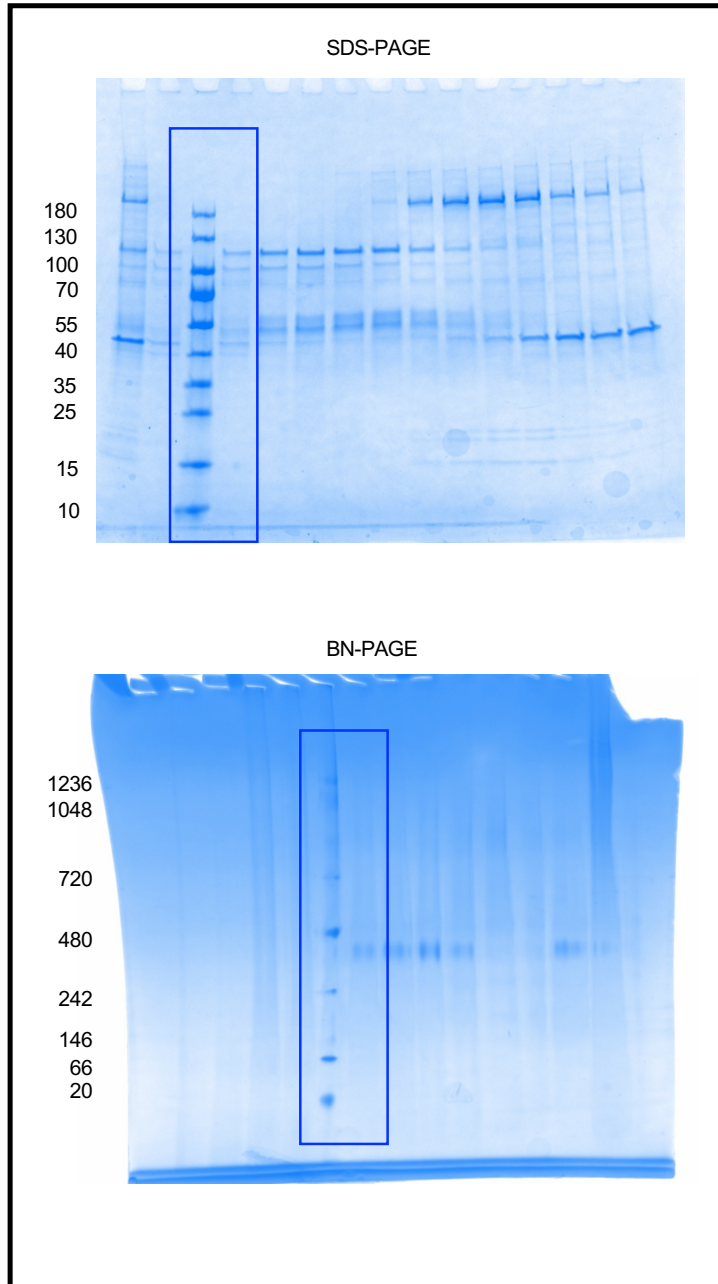

**Extended Data Fig. 2c**

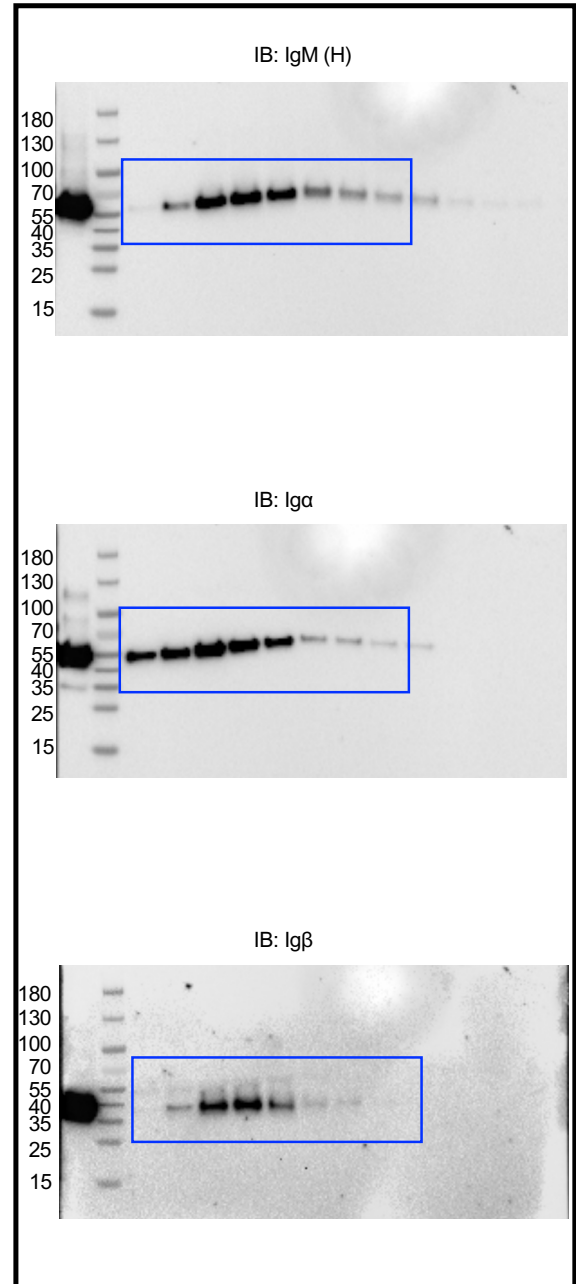

**Supplementary Table 1. Summary of mutagenesis data.**

| Region      | Mutations in other studies | Residues in mouse IgM BCR |
|-------------|----------------------------|---------------------------|
| IgM         | R479A/E480                 | R340/E341                 |
|             | R485A/E486A                | R346/E347                 |
|             | Q487A/Q493A                | Q366/Q372                 |
|             | T530A/T533A                | S409/T412                 |
|             | D553A/E565A                | D432/E443                 |
|             | E567A/E568A                | E438/R439                 |
|             | T573A/Y587A                | T452/Y466                 |
|             | F577W                      | F456                      |
|             | F581W                      | F460                      |
|             | Y587V/S588V                | Y466/S467                 |
| Ig $\alpha$ | W76R                       | W71                       |
|             | P77W                       | P72                       |
|             | R124A/V125A/R126A          | R118/V119/R120            |
|             | E138H                      | E132                      |
|             | E142A/K                    | E142                      |
|             | L152W                      | L147                      |
|             | L153W                      | L148                      |
|             | P153A (mouse)              | P153                      |
|             | A156W                      | A150                      |
| Ig $\beta$  | W47A                       | W47                       |
|             | F52W                       | F52                       |
|             | R55A/K56A/R57A             | K55/K56/R57               |
|             | C135S (mouse)              | C135                      |
|             | K158H                      | K157                      |
|             | I161W                      | I161                      |
|             | Q164A/K                    | Q164                      |
|             | F172A                      | F171                      |
|             | P175A (mouse)              | P175                      |
| IgG         | E459A                      | N440                      |
|             | E464A                      | G445                      |
|             | W469A                      | W450                      |
|             | F475A                      | F456                      |
|             | F479A                      | F460                      |
|             | S482H                      | S463                      |

All mutations<sup>1-5</sup> are with human BCR unless labelled as mouse. The mutations are at the interface between IgM and Ig $\alpha/\beta$ , blocking BCR assembly. The key residues involved in salt bridge and hydrogen bond formation identified in our study are labelled in red.

1. Radaev, S. *et al.* Structural and functional studies of Ig $\alpha\beta$  and its assembly with the B Cell antigen receptor. *Structure* **18**, 934–943 (2010).
2. Gottwick, C. *et al.* A symmetric geometry of transmembrane domains inside the B cell antigen receptor complex. *Proc. Natl. Acad. Sci.* **116**, 13468–13473 (2019).

3. Shaw, C., Mitchell, N., Weaver, Y. K. & Abbas, A. K. Mutations of immunoglobulin transmembrane and cytoplasmic domains: effects on intracellular signaling and antigen presentation. *Cell* **63**, 381–392 (1990).
4. Su, Q. *et al.* Cryo-EM structure of the human IgM B cell receptor. *Science* **337**, 875–880 (2022).
5. Ma, X. *et al.* Cryo-EM structures of two human B cell receptor isotypes. *Science* **377**, 880–885 (2022).
